# Supplementary material for: Mechanically robust hybrid hydrogels of photo-crosslinkable gelatin and laminin-mimetic peptide amphiphiles for neural induction
Source: Royal Society of Chemistry journal article supplement (doi:10.1039/d1bm01350e), 2021-01-01
Supplement: d1bm01350e1.xlsx [file d1bm01350e1.xlsx]

## Sheet: Group 1 Mean SE ttest
		GelMA(-)/PA-GSR(+) (SH-SY5Y, N2B27)		GelMA(-)/PA-GSR(+) (SH-SY5Y, RA+BDNF)		GelMA(-) (SH-SY5Y, N2B27)		GelMA(-)/PA-RGDS(+) (SH-SY5Y, N2B27)			GelMA(-)/PA-GSR(+), N2B27 vs RA+BDNF
Instrument	Metabolites	Mean	SE	Mean	SE	Mean	SE	Mean	SE		Metabolite	p-value
LC-MS (-)	1,2-Dilauroyl-Sn-Glycero-3-Phosphate	1.135	0.0769697	0.829667	0.130436	0.825667	0.371318	0.915667	0.0867897		Thymidine 5'-Monophosphate	0.00785703
GC-MS	1,3-Diaminopropane	0.828667	0.381679	0.639333	0.151156	1.793	0.488248	1.099	0.199767		Xanthosine 5'-Monophosphate	0.00865097
LC-MS/MS (-)	1,4-Cyclohexanedicarboxylic Acid	1.209	0.174612	0.921667	0.12342	0.974333	0.421446	1.26633	0.134566		Uridine 5'-Monophosphate	0.010428
LC-MS (-)	1-Hydroxypyrene	0.573333	0.0810151	0.454267	0.25779	1.56493	0.984097	0.787667	0.158865		Lithocholic Acid	0.0109129
LC-MS (-)	1-Myristoyl-2-Hydroxy-Sn-Glycero-3-Phosphoethanolamine	0.492667	0.271484	0.582333	0.175561	2.589	2.00456	0.336	0.116316		Soyasapogenol B 3-O-B-D-Glucuronide	0.0134625
LC-MS (+)	1-O-(Indol-3-Ylacetyl)-Beta-D-Glucose	0.723733	0.359252	1.33467	0.439336	0.794333	0.280793	0.941	0.160304		Thymidine-5'-Diphosphate	0.0144135
LC-MS (-)	2,3-Dideoxyuridine	1.545	0.173394	0.886	0.0523864	0.116133	0.0621135	1.38833	0.0192209		L-Ornithine	0.0177166
LC-MS (-)	2',4-Dihydroxy-3,4',6'-Trimethoxychalcone	3.427	3.17004	0.305667	0.0791714	0.271333	0.0743894	0.224667	0.0185233		2,3-Dideoxyuridine	0.022
LC-MS (-)	2-Acetoxy-6-Pentadecylbenzoic Acid	0.73	0.167441	0.608667	0.0925497	0.783333	0.180903	0.603	0.0809588		L-Pipecolic Acid	0.0273139
GC-MS	2-Aminoethanethiol (Cysteamine)	0.153667	0.0878869	0.253667	0.0848063	3.918	1.4034	0.33	0.176072		Ribose	0.0379973
GC-MS	2'-Deoxycytidine	0.733667	0.523719	0.76	0.410556	0.902	0.629564	2.14667	0.0731125		Cellobiose	0.038865
LC-MS (-)	2-Deoxy-D-Glucose	1.51933	1.30762	0.479333	0.169702	0.959667	0.382897	0.926333	0.628231		2'-Deoxyinosine-5'-Triphosphate	0.0393538
LC-MS (-)	2'-Deoxyinosine-5'-Triphosphate	1.43467	0.168919	0.925333	0.00185592	0.0692	0.0253148	1.244	0.137961		Methyl Heptadecanoate	0.0423525
GC-MS	2-Ketocaproic Acid	0.0366667	0.0356667	2.09767	2.04175	1.45433	1.42791	0.055	0.0490034		Palmitoleic Acid	0.0515443
LC-MS (-)	2'-O-Methyl-5-Methylcytidine	1.41967	0.340018	0.607	0.161358	0.807333	0.375057	1.134	0.520052		Cholic Acid	0.0547906
LC-MS (-)	2-Oxoglutaric Acid	0.856	0.25925	0.5088	0.22703	1.13447	0.535844	0.885	0.222663		Pe(18:1/13-Hode)	0.0570793
LC-MS (-)	3,5-Dihydroxyphenylglycine	0.430933	0.341533	0.407467	0.173354	1.19	0.175392	1.06067	0.202958		Pyridoxine	0.0743172
LC-MS (-)	3-Chlorotyrosine	1.615	0.684313	1.03567	0.525679	0.608267	0.39142	0.804	0.186433		Glucoheptonic Acid	0.0911488
LC-MS (-)	3-Hydroxybutanoic Acid	0.999333	0.248496	0.604867	0.291814	1.37367	0.243613	0.869333	0.120339		Pc(16:1/13-Hode)	0.0924502
GC-MS	3-Methyl-2-Oxobutanoic Acid	0.952667	0.623116	1.465	0.483148	1.512	0.306709	0.707	0.0553263		Pentanedioic Acid	0.0947045
LC-MS (-)	3-Methyladipic Acid	0.347067	0.230467	0.861	0.144438	1.46467	0.117511	0.748867	0.320375		2'-O-Methyl-5-Methylcytidine	0.0969686
GC-MS	4-Aminobenzoic Acid	0.765	0.383298	1.30833	0.149137	1.57067	0.172299	0.996333	0.0478934		D-Ala-D-Ala	0.0972386
GC-MS	4-Methyl-5-Thiazoleethanol	0.701	0.296777	1.21933	0.138344	1.01233	0.057762	1.577	0.131705		Thymidine	0.110113
LC-MS (-)	4-Pyridoxate	1.137	0.358531	1.02633	0.324034	1.33367	0.185257	0.719333	0.102216		Acetol	0.110636
LC-MS (-)	5alpha-Cholestan-3beta-Ol-6-One	0.99	0.123187	0.837333	0.11599	1.04567	0.2848	0.906667	0.137751		1,2-Dilauroyl-Sn-Glycero-3-Phosphate	0.114011
LC-MS (-)	5-Aminoimidazole-4-Carboxamide	0.913	0.0631744	0.902333	0.170548	1.12367	0.306956	0.763067	0.329589		Gly-Pro	0.114238
GC-MS	5-Aminovaleric Acid	0.729667	0.511566	1.70033	0.60525	1.587	0.421921	0.649	0.069407		Phenylethylamine	0.11578
LC-MS (-)	5-Methoxy-3-Indoleacetic Acid	0.839333	0.0763246	0.784333	0.0828821	1.3094	0.611254	1.04267	0.268855		Methionine	0.118958
LC-MS (-)	7-Oxocholesterol	1.18	0.306089	0.898333	0.0653512	0.914333	0.181572	0.806	0.0349619		N-Acetyl-D-Tryptophan	0.121857
GC-MS	8-Aminocaprylic Acid	0.5472	0.399694	1.57667	0.604327	1.503	0.501398	0.39	0.0508953		Pe(16:1/13-Hode)	0.126903
GC-MS	Acetol	0.748667	0.403789	1.74933	0.277475	1.22267	0.236063	0.939333	0.0300241		Sophorose	0.127585
LC-MS (+)	Acetyl Coenzyme A	0.6972	0.312992	0.419867	0.158919	0.844	0.212731	0.922333	0.166958		Leucine	0.130374
GC-MS	Acetyl-L-Serine	0.579667	0.463784	1.784	0.571824	1.812	0.534998	0.490333	0.0819803		3-Methyladipic Acid	0.131819
LC-MS (+)	Aconitic Acid	0.9486	0.415764	0.540533	0.378733	0.927267	0.399112	1.03633	0.180563		Spermidine	0.133252
GC-MS	Alanine	0.895667	0.428145	1.56633	0.206863	1.12433	0.391399	1.02667	0.208208		Beta-D-Glucopyranoside	0.133923
LC-MS/MS (-)	Arachidonic Acid	0.110333	0.0151033	0.069	0.017673	0.173333	0.0550586	0.325667	0.0366257		Pe(P-16:0/15:0)	0.137542
GC-MS	Aspartic Acid	0.657667	0.335504	1.17767	0.170265	1.47533	0.144021	1.307	0.221505		Leucrose	0.147574
GC-MS	Benzene-1,2,4-Triol	1.13167	0.590605	1.142	0.370984	1.464	0.326858	0.622333	0.0566784		Arachidonic Acid	0.150039
GC-MS	Beta- Alanine	0.685667	0.356167	1.07833	0.123629	1.82667	0.135566	1.06167	0.158211		Isomaltose	0.155691
LC-MS (-)	Beta-D-Glucopyranoside	0.4662	0.218888	0.0556	4.90654e-18	1.397	0.460375	0.209867	0.0773082		Pc(17:1/18-Hete)	0.156996
LC-MS (+)	Beta-N-Methylaminoalanine	1.20967	0.342029	0.953	0.110496	0.869333	0.145866	0.894667	0.0729985		Ketoisovaleric Acid	0.161149
LC-MS/MS (+)	C17-Sphinganine	0.7612	0.471237	0.417867	0.160348	0.6944	0.5928	0.928667	0.200661		Acetyl-L-Serine	0.177233
GC-MS	Cellobiose	0.235933	0.0940656	0.881667	0.191404	0.566667	0.0719776	0.36	0.023094		4-Methyl-5-Thiazoleethanol	0.18859
GC-MS	Cholesterol	0.542667	0.315922	1.13533	0.246815	0.918333	0.138372	0.737	0.0653911		L-Lysine	0.205549
LC-MS (-)	Cholic Acid	0.548333	0.223313	1.21267	0.105964	0.504333	0.45537	0.909	0.255408		Cholesterol	0.213397
LC-MS (+)	Cis-Aconitate	0.915667	0.102335	0.838333	0.0427798	0.817067	0.353159	0.618067	0.23982		Lactamide	0.214756
GC-MS	Citrulline	0.59	0.289217	0.582333	0.230507	2.61267	0.273217	0.766333	0.184256		8-Aminocaprylic Acid	0.228402
LC-MS (+)	Cpa(16:0/0:0)	1.22733	0.682235	0.647667	0.0492149	0.621333	0.219893	0.683667	0.220999		Inosine	0.230604
GC-MS	Cytidine	0.649	0.406744	1.89667	0.898564	0.578333	0.0519658	0.947667	0.492338		Alanine	0.231228
LC-MS (-)	Cytidine-5'-Monophosphate	0.863	0.397681	1.18667	0.483361	0.975333	0.432198	0.649867	0.314381		Hypotaurine	0.23175
GC-MS	D (+) Galactose	0.754333	0.454134	1.979	0.753018	0.926	0.189774	0.749667	0.0329157		D (+) Galactose	0.236135
GC-MS	D-Ala-D-Ala	0.689	0.337634	1.62267	0.270929	0.966667	0.141551	1.37733	0.131129		Aspartic Acid	0.239103
LC-MS (-)	Decanoic Acid	0.826333	0.119813	0.986	0.08213	0.754333	0.292293	0.936	0.0736546		Pc(18:1e/16,17-Epdpe)	0.239871
LC-MS (+)	Deoxycholic Acid	0.592	0.54	0.377	0.229012	1.319	1.00239	0.6	0.197285		Pc(16:1/10-Hdohe)	0.246498
GC-MS	D-Glucosaminic Acid	1.06667	0.269747	1.15967	0.116575	0.885667	0.554743	1.101	0.492872		Linoleic Acid	0.247568
GC-MS	D-Glucose	0.439	0.3412	0.507	0.192578	0.475	0.264205	0.173	0.0930645		1,4-Cyclohexanedicarboxylic Acid	0.250186
GC-MS	D-Glucose-6-Phosphate	0.822667	0.672363	1.92667	0.53816	1.15967	0.227911	0.748	0.172088		D-Lyxose	0.25292
GC-MS	Dl-3-Aminoisobutyric Acid	0.676	0.339484	1.024	0.109345	2.198	0.0642806	0.765667	0.117295		L-Canavanine	0.256311
GC-MS	Dl-Glyceraldehyde	1.343	0.300074	1.44533	0.328334	0.609667	0.204084	0.932333	0.0325389		4-Aminobenzoic Acid	0.256988
GC-MS	D-Lyxose	0.814333	0.408952	1.41033	0.179438	1.34967	0.227472	1.06433	0.130946		D-Sorbitol	0.258377
GC-MS	D-Malic Acid	0.597	0.317264	0.779	0.125117	1.007	0.170477	0.712667	0.0146553		Lactulose	0.260566
LC-MS (+)	D-Ornithine	1.14267	0.30744	0.645667	0.362702	0.374267	0.188727	1.51767	0.279357		Pc(16:0/13-Hode)	0.265571
GC-MS	D-Sorbitol	0.329	0.245976	0.692667	0.125717	1.10033	0.472501	0.870667	0.45167		D-Glucose-6-Phosphate	0.269131
GC-MS	D-Threitol	0.498667	0.28222	0.626333	0.113719	1.202	0.247364	0.432	0.00888819		L-Tryptophan	0.272146
GC-MS	Fructose	0.261333	0.109368	0.3292	0.168666	2.84067	0.906389	0.166733	0.147133		Myristic Acid	0.272807
GC-MS	Fumaric Acid	0.969333	0.492081	1.10933	0.144506	1.531	0.0840972	1.05567	0.12117		Cytidine	0.274564
GC-MS	Galactinol	0.747333	0.551689	2.07667	0.935396	1.34767	0.469214	0.465333	0.0257704		Putrescine	0.276059
LC-MS (-)	Gamma-Glutamylglutamine	0.892667	0.242842	1.313	0.350753	0.929667	0.423359	0.891667	0.229835		Glycerone Phosphoric Acid	0.277316
LC-MS (+)	Glccer(D14:1/20:0)	0.883333	0.140862	0.826333	0.0756512	1.17	0.209629	0.820667	0.0735421		Myo-Inositol	0.280956
GC-MS	Glucoheptonic Acid	0.581	0.309894	2.14367	0.633896	1.15067	0.271343	0.774	0.0196554		Pc(18:0/12-Hepe)	0.285584
GC-MS	Gluconic Acid Lactone	0.0198667	0.0105491	0.037	0.00929157	0.0423333	0.00260342	0.0196667	0.00338296		5-Aminovaleric Acid	0.287831
GC-MS	Glyceric Acid	0.389333	0.158242	0.923333	0.505912	1.313	0.149474	0.754667	0.00622718		Galactinol	0.288082
GC-MS	Glycerol	0.808667	0.752754	0.994	0.532947	1.31867	0.255774	0.545	0.272979		Picolonic Acid	0.288593
GC-MS	Glycerol 1-Phosphate	0.781333	0.545353	1.39433	0.537031	1.23067	0.353702	0.641	0.0670398		Gluconic Acid Lactone	0.289885
GC-MS	Glycerone Phosphoric Acid	0.431667	0.351929	2.284	1.4316	1.593	0.564556	0.262333	0.0614962		Pc(16:0/11,12-Epete)	0.299482
GC-MS	Glycine	0.723	0.359475	0.905	0.403203	1.596	0.164239	1.10567	0.0462685		Pc(14:0/11,12-Epete)	0.325243
LC-MS (-)	Glycocholic Acid	0.932	0.119274	0.935333	0.168889	1.16133	0.497874	1.15433	0.249008		N-Methylglutamic Acid	0.32725
LC-MS (-)	Glycolithocholic Acid	0.394667	0.321667	0.443667	0.239959	1.08967	0.578415	0.319	0.125714		Decanoic Acid	0.333402
GC-MS	Gly-Pro	0.479	0.242572	1.48133	0.434482	1.87133	0.341919	0.822333	0.0706407		Sucrose	0.333818
GC-MS	Heptadecanoic Acid	0.926333	0.510391	1.43467	0.273723	1.28833	0.166636	0.926333	0.0586922		Isopropylmalic Acid	0.335486
LC-MS (+)	Hyocholic Acid	1.045	0.304264	0.847333	0.239842	1.239	0.306686	0.701	0.047648		Sarcosine	0.341024
LC-MS (-)	Hypotaurine	1.17533	0.255193	0.729333	0.187452	1.317	0.118507	0.777667	0.112204		L-Isoleucine	0.342055
GC-MS	Inosine	0.307333	0.160678	0.729	0.251537	1.80233	0.899958	1.33533	0.89389		1-O-(Indol-3-Ylacetyl)-Beta-D-Glucose	0.342301
GC-MS	Isoleucine	0.973333	0.903935	1.686	0.879489	1.843	0.964166	0.0506667	0.0283862		D-Ornithine	0.354898
GC-MS	Isomaltose	0.722667	0.360722	1.56567	0.320809	1.44067	0.289837	0.914333	0.0258607		Beta- Alanine	0.356443
LC-MS (-)	Isopropylmalic Acid	0.777	0.153324	1.06833	0.217788	1.22167	0.25189	0.932667	0.228544		3-Hydroxybutanoic Acid	0.361556
LC-MS (-)	Ketoisovaleric Acid	0.977667	0.0331729	1.04433	0.0201853	0.934	0.373746	1.072	0.034356		Maltose	0.369337
GC-MS	L-(-)-Fucose	0.935667	0.427558	1.07933	0.156755	1.19767	0.12102	1.09033	0.0177044		2-Ketocaproic Acid	0.369937
GC-MS	L-(+) Lactic Acid	0.652333	0.286906	0.827	0.148688	0.811667	0.176998	0.761333	0.145329		2-Oxoglutaric Acid	0.37068
GC-MS	Lactamide	0.316	0.0530031	0.474	0.0932577	1.51767	0.71072	2.09567	0.80419		Glyceric Acid	0.37074
GC-MS	Lactose	0.56	0.237719	0.805333	0.190954	0.578333	0.0930705	0.389667	0.0364112		Gamma-Glutamylglutamine	0.380269
GC-MS	Lactulose	0.767333	0.41269	1.43467	0.299088	1.363	0.188661	1.096	0.031241		2',4-Dihydroxy-3,4',6'-Trimethoxychalcone	0.380681
GC-MS	L-Alanine	0.896933	0.490969	1.32633	0.38271	1.29367	0.200795	0.654667	0.142038		Dl-3-Aminoisobutyric Acid	0.384451
LC-MS (+)	L-Arginine	1.22433	0.167109	1.143	0.18796	0.723333	0.0276064	0.909333	0.127886		Lysine	0.396356
LC-MS (+)	Lauroylcarnitine	0.932667	0.217815	0.802	0.107528	1.28933	0.286863	0.766	0.0992085		Thymine	0.409805
GC-MS	L-Canavanine	0.0383333	0.0194279	0.075	0.0197569	0.581	0.530001	0.0543333	0.0141107		5alpha-Cholestan-3beta-Ol-6-One	0.417927
GC-MS	Leucine	0.509333	0.204539	0.928	0.0822456	0.684333	0.252446	0.417667	0.135307		7-Oxocholesterol	0.419039
GC-MS	Leucrose	0.451	0.235864	0.967667	0.165764	0.566333	0.284453	0.603	0.0311823		Pc(17:0/12-Hete)	0.421154
LC-MS (-)	Linoleic Acid	0.873	0.152286	0.640667	0.0794362	1.05033	0.341724	0.665333	0.147388		Porphine	0.421238
LC-MS (+)	L-Isoleucine	0.205333	0.0600481	0.272333	0.016231	0.153067	0.0974769	0.181333	0.0590546		Uridine 5_-Triphosphate	0.422794
LC-MS (+)	Lithocholic Acid	0.993333	0.191202	0.135	0	0.603667	0.251673	1.04633	0.054569		L-Serine	0.42406
LC-MS (-)	L-Kynurenine	0.976667	0.165211	1.01733	0.141781	1.08633	0.479526	0.885667	0.11875		Threose	0.425548
LC-MS (-)	L-Lysine	1.08767	0.0253925	0.996	0.0551392	0.753333	0.314263	1.37333	0.139448		Heptadecanoic Acid	0.429657
GC-MS	L-Methionine	0.278333	0.214899	0.401333	0.139671	0.486667	0.254693	0.158667	0.024504		N-Acetylmethionine	0.430779
GC-MS	L-Norleucine	0.246267	0.240876	0.4536	0.41042	0.054	0.00984886	0.621667	0.0506831		Threonine	0.433585
GC-MS	L-Ornithine	1.132	0.0919638	0.52	0.127735	2.08733	0.532281	0.921667	0.180703		Cpa(16:0/0:0)	0.44447
LC-MS (+)	L-Pipecolic Acid	1.17233	0.0286201	1.008	0.0389744	0.7046	0.288018	1.34867	0.0347387		2-Aminoethanethiol (Cysteamine)	0.458884
GC-MS	L-Pyroglutamic Acid	0.901333	0.578567	1.41067	0.294169	1.39633	0.290432	0.818	0.0764918		Lactose	0.466155
GC-MS	L-Serine	0.671667	0.660668	1.58067	0.779843	1.94133	0.362788	0.446667	0.435698		Glycerol 1-Phosphate	0.468059
LC-MS/MS (+)	L-Tryptophan	0.868	0.134179	1.18167	0.206786	0.876333	0.0333383	0.7888	0.322205		Methylmalonic Acid	0.470101
GC-MS	L-Tyrosine	1.22367	0.0196751	1.39033	0.219667	1.11233	0.358527	0.908	0.067		Acetyl Coenzyme A	0.473691
GC-MS	Lysine	0.75	0.461964	1.42267	0.53759	1.48833	0.336181	0.705667	0.0818949		2-Deoxy-D-Glucose	0.474392
GC-MS	Malonic Acid	0.676333	0.5369	0.989	0.907177	2.04167	1.8927	0.614667	0.0640555		L-Pyroglutamic Acid	0.476483
GC-MS	Maltose	1.43567	1.30582	0.115333	0.0380234	0.00833333	0.000333333	0.056	0.0126623		N-Acetyl-L-Glutamic Acid	0.483192
LC-MS (-)	Methionine	1.229	0.168435	0.850333	0.0908136	1.057	0.426861	1.148	0.141715		Talose	0.49063
GC-MS	Methyl Heptadecanoate	0.909667	0.23898	1.732	0.14518	1.11933	0.201192	0.859667	0.0168358		L-Tyrosine	0.49189
GC-MS	Methyl Palmitoleate	0.674667	0.330606	0.834333	0.300866	0.534667	0.167005	0.543	0.0446019		Oleamide	0.498099
GC-MS	Methyl-Beta-D-Galactopyranoside	0.908	0.477262	1.121	0.0383536	1.41	0.1635	1.22233	0.279543		Pc(16:1e/17-Hdohe)	0.507976
GC-MS	Methylmalonic Acid	0.836133	0.405057	1.245	0.314848	1.239	0.0720162	0.838333	0.0225561		Aconitic Acid	0.508275
GC-MS	Myo-Inositol	0.716333	0.449559	1.46367	0.397475	1.406	0.344044	0.720667	0.0215278		N-Acetylglycine	0.508976
GC-MS	Myristic Acid	0.868333	0.395788	1.47067	0.261056	1.20467	0.160334	0.913667	0.0347195		Beta-N-Methylaminoalanine	0.514631
GC-MS	N-Acetyl-D-Tryptophan	0.09	0.0584836	0.48	0.190421	3.36967	1.23408	0.716	0.330591		Cis-Aconitate	0.524064
LC-MS (-)	N-Acetylglycine	0.63	0.151477	1.3484	0.980214	0.830733	0.389948	0.515733	0.232518		L-Alanine	0.52826
GC-MS	N-Acetyl-L-Glutamic Acid	0.855667	0.425674	1.21	0.171652	1.012	0.11253	1.24967	0.303582		C17-Sphinganine	0.528286
LC-MS (-)	N-Acetylmethionine	1.034	0.318115	0.736667	0.119038	0.723467	0.310131	1.20667	0.158306		Pe(18:0/11,12-Epete)	0.532519
LC-MS (-)	N-Acetyl-O-Methyltyrosine	0.873333	0.213297	1.031	0.15709	1.031	0.214133	0.656667	0.0543732		S4:19(P3:17/F1:2)	0.53283
GC-MS	N-Acetyl-Ornithine	0.938667	0.471679	0.628	0.388824	1.275	0.319479	1.48833	0.251013		3-Chlorotyrosine	0.538765
LC-MS (+)	Nervonic Acid	0.667667	0.210144	0.9584	0.47579	0.0737333	0.0397157	0.992333	0.0858862		Stearic Acid	0.541985
LC-MS (-)	N-Methylglutamic Acid	0.857667	0.147854	1.21733	0.286631	1.17553	0.559861	0.917	0.154165		Pc(14:0/11,12-Eet)	0.545502
LC-MS (-)	N-Methyllysine	1.158	0.18629	1.134	0.236837	0.699933	0.298684	1.19133	0.116872		Pi(19:0/18-Hete)	0.546549
LC-MS (+)	Oleamide	1.07567	0.403512	0.768667	0.0857639	1.27567	0.125066	0.685333	0.136096		3-Methyl-2-Oxobutanoic Acid	0.551269
GC-MS	O-Phosphocolamine	0.97	0.73369	0.953667	0.303524	1.701	0.23737	0.69	0.0801311		2-Acetoxy-6-Pentadecylbenzoic Acid	0.560405
LC-MS (-)	O-Phosphoserine	0.5196	0.203277	0.611933	0.245132	0.774267	0.365044	0.554933	0.220043		Pe(16:0/9-Hode)	0.564965
GC-MS	Palmitoleic Acid	0.738	0.376397	1.85767	0.156479	1.15533	0.253571	0.855333	0.0342264		N-Acetyl-O-Methyltyrosine	0.583754
LC-MS (-)	Pc(14:0/11,12-Eet)	0.991	0.538457	0.614667	0.188419	1.86467	1.22651	0.471667	0.227104		Isoleucine	0.60221
LC-MS (-)	Pc(14:0/11,12-Epete)	0.0687333	0.0441333	2.31733	2.00637	0.216533	0.129459	0.174533	0.0999504		Nervonic Acid	0.606001
LC-MS (-)	Pc(16:0/11,12-Epete)	0.1194	0.0778	0.418533	0.238799	1.15987	0.772403	0.960667	0.544255		L-(+) Lactic Acid	0.617529
LC-MS (-)	Pc(16:0/13-Hode)	0.869667	0.429538	0.247867	0.216067	1.51233	1.09057	0.3502	0.3184		Lauroylcarnitine	0.619166
LC-MS (-)	Pc(16:1/10-Hdohe)	0.897333	0.14485	1.611	0.50584	0.138933	0.0885333	1.34967	0.548974		D-Malic Acid	0.621855
LC-MS (-)	Pc(16:1/13-Hode)	0.563333	0.18369	0.1422	0.0532526	1.8122	1.59016	1.31533	0.99562		Cytidine-5'-Monophosphate	0.632366
LC-MS (-)	Pc(16:1e/17-Hdohe)	1.01867	0.136228	1.256	0.29711	0.0462	0.0264	1.02533	0.161988		Hyocholic Acid	0.636774
LC-MS (-)	Pc(17:0/12-Hete)	1.22	0.228698	0.962667	0.174013	0.851	0.151694	0.965667	0.0968819		N-Acetyl-Ornithine	0.638044
LC-MS (-)	Pc(17:1/18-Hete)	0.868333	0.0217588	1.21367	0.19737	0.0578	0	0.918	0.314872		Serine	0.644507
LC-MS (-)	Pc(18:0/12-Hepe)	1.21733	0.637885	0.3486	0.3012	0.0474	0	0.798667	0.352672		S4:18(P3:16/F1:2)	0.644621
LC-MS (-)	Pc(18:1e/16,17-Epdpe)	1.20233	0.212267	0.908333	0.0192209	0.0928667	0.0530667	0.516533	0.476733		5-Methoxy-3-Indoleacetic Acid	0.650998
LC-MS (-)	Pe(16:0/11,12-Epete)	0.851267	0.416869	0.736333	0.380477	0.714	0.0738196	0.534667	0.22275		L-Methionine	0.656357
LC-MS (-)	Pe(16:0/9-Hode)	0.922067	0.540911	1.394	0.524266	0.404067	0.238808	0.3974	0.240404		Pentadecanoic Acid	0.656911
LC-MS (-)	Pe(16:1/13-Hode)	0.0842667	0.0416942	1.552	0.762303	0.3956	0.229232	1.17427	1.01333		1,3-Diaminopropane	0.668616
LC-MS (-)	Pe(18:0/11,12-Epete)	0.435867	0.228894	0.700867	0.313785	0.4994	0.4248	0.895667	0.138372		Methyl-Beta-D-Galactopyranoside	0.679431
LC-MS (-)	Pe(18:1/13-Hode)	0.396467	0.185941	1.33133	0.300056	0.0394	0	0.637667	0.234692		1-Hydroxypyrene	0.682249
LC-MS/MS (+)	Pe(P-16:0/15:0)	1.13233	0.267235	0.636	0.01861	0.996	0.245362	0.904667	0.212283		L-Norleucine	0.685549
LC-MS (-)	Pentadecanoic Acid	0.945667	0.10485	0.880333	0.0872111	1.067	0.324213	0.920333	0.082584		Sedoheptulose Anhydride Monohydrate	0.693366
LC-MS (-)	Pentanedioic Acid	0.861333	0.0963766	0.617333	0.0568751	1.00167	0.263282	1.51967	0.304347		D-Threitol	0.696345
GC-MS	Phenylalanine	0.398667	0.381674	0.58	0.572001	0.937667	0.283705	0.909667	0.08196		Sphingomyelin	0.719955
GC-MS	Phenylethylamine	0.541333	0.38643	1.91167	0.564743	1.63967	0.483329	0.569667	0.070172		Thymidine-3',5'-Cyclic Monophosphate	0.724678
LC-MS (+)	Phosphocholine	0.663867	0.287001	0.6312	0.301138	0.3854	0.2638	0.855867	0.466321		Deoxycholic Acid	0.732523
GC-MS	Phosphoric Acid	0.572733	0.418133	0.766867	0.351735	1.07553	0.462444	1.45733	0.110987		Succinic Acid	0.735708
LC-MS (-)	Pi(19:0/18-Hete)	0.9558	0.471171	0.554	0.388599	1.09113	0.541801	0.901333	0.280035		Methyl Palmitoleate	0.739
GC-MS	Picolonic Acid	0.3306	0.301412	1.13893	0.588462	1.35933	0.206764	1.176	0.0150444		Glccer(D14:1/20:0)	0.739481
GC-MS	Porphine	0.736667	0.719668	1.744	0.864891	1.71467	0.419244	0.465333	0.223816		Phosphoric Acid	0.740312
GC-MS	Putrescine	0.401	0.349293	2.41833	1.56205	1.62967	0.625748	0.216667	0.0651059		Fructose	0.752632
GC-MS	Pyridoxine	0.0886	0.0410117	0.214	0.0323574	0.120667	0.035881	0.132333	0.0197512		Glycine	0.75311
GC-MS	Ribitol	1.18633	0.536804	1.02467	0.118125	1.05967	0.487913	1.34067	0.0435903		L-Arginine	0.762603
GC-MS	Ribose	0.299333	0.146834	2.235	0.617247	0.771333	0.38214	1.29	0.248818		D-Glucosaminic Acid	0.767467
LC-MS (-)	S4:17(P3:15/F1:2)	0.7498	0.49814	0.5568	0.368423	1.05647	0.783424	0.990667	0.35247		L-(-)-Fucose	0.76817
LC-MS (-)	S4:18(P3:16/F1:2)	0.956933	0.660004	0.625333	0.088152	0.4136	0.219531	1.31127	0.937553		S4:17(P3:15/F1:2)	0.770979
LC-MS (-)	S4:19(P3:17/F1:2)	1.04667	0.565319	0.626333	0.246083	0.567667	0.267938	1.441	0.276706		Malonic Acid	0.781531
GC-MS	Sarcosine	0.683667	0.556072	1.59867	0.639485	1.08367	0.459498	0.227333	0.0680204		Ribitol	0.783291
GC-MS	Sedoheptulose Anhydride Monohydrate	0.392	0.207805	0.480333	0.014746	0.774	0.0744133	0.527333	0.118953		O-Phosphoserine	0.786268
GC-MS	Serine	1.00833	0.736346	1.68333	1.1374	0.486	0.075505	0.0100667	0.00746667		Thiamine Pyrophosphate	0.788238
GC-MS	Sophorose	0.705333	0.339242	1.54867	0.279774	1.41633	0.253144	0.923333	0.0263902		Taurodeoxycholic Acid	0.788826
LC-MS/MS (+)	Soyasapogenol B 3-O-B-D-Glucuronide	0.800333	0.145662	1.53033	0.0932029	0.242667	0.093419	0.800333	0.406391		1-Myristoyl-2-Hydroxy-Sn-Glycero-3-Phosphoethanolamine	0.795259
LC-MS (+)	Spermidine	0.254333	0.00902466	0.182667	0.037033	0.401333	0.0866224	0.330667	0.0199193		Fumaric Acid	0.798384
LC-MS/MS (+)	Sphingomyelin	0.785667	0.260125	0.631867	0.303427	0.968333	0.232144	0.885667	0.188721		Phenylalanine	0.805038
GC-MS	Squalene	1.33433	0.894981	1.5	0.719857	0.725333	0.0384115	0.694333	0.425465		Uracil	0.811282
GC-MS	Stearic Acid	0.907	0.581658	1.32967	0.254379	1.373	0.173079	0.906667	0.0398386		Dl-Glyceraldehyde	0.829327
GC-MS	Succinic Acid	0.531533	0.238981	0.641333	0.186867	0.850333	0.045337	0.671667	0.025208		4-Pyridoxate	0.830102
GC-MS	Sucrose	1.99033	0.988566	0.884667	0.191193	1.053	0.375346	0.582667	0.0697073		Pe(16:0/11,12-Epete)	0.848576
GC-MS	Talose	0.0704	0.0425969	0.038	0.00351188	0.503333	0.453911	0.0633333	0.0218658		Glycerol	0.850547
LC-MS/MS (+)	Taurodeoxycholic Acid	0.99	0.211807	0.922333	0.104773	1.01833	0.0971362	0.665333	0.0538217		L-Kynurenine	0.860913
LC-MS (+)	Taurolithocholic Acid	0.963333	0.473918	0.861	0.511798	2.09633	1.54703	0.741333	0.144349		D-Glucose	0.870641
LC-MS (-)	Thiamine Pyrophosphate	0.826	0.0735957	0.954267	0.440538	0.8476	0.360146	0.4962	0.3604		Taurolithocholic Acid	0.890458
GC-MS	Threonine	0.0286667	0.0142634	0.045	0.0122202	0.0483333	0.00523874	0.0346667	0.00622718		Squalene	0.892287
GC-MS	Threose	0.829333	0.34671	1.33567	0.454087	1.09967	0.394591	0.850333	0.0908503		Trans-4-Hydroxy-L-Proline	0.90079
GC-MS	Thymidine	0.555667	0.345546	1.31733	0.138206	1.46567	0.0870064	1.28533	0.168272		Glycolithocholic Acid	0.908708
LC-MS (-)	Thymidine 5'-Monophosphate	1.60567	0.115385	1.032	0.0145258	0.0396667	0.0226667	1.27733	0.0939314		N-Methyllysine	0.940342
LC-MS (-)	Thymidine-3',5'-Cyclic Monophosphate	0.688067	0.267614	0.789333	0.0133333	1.671	0.545444	0.868667	0.0283686		Phosphocholine	0.941181
LC-MS/MS (+)	Thymidine-5'-Diphosphate	1.29767	0.12501	0.230933	0.225533	0.0126	0.0072	0.801467	0.400873		3,5-Dihydroxyphenylglycine	0.954084
GC-MS	Thymine	0.910333	0.543115	1.45933	0.247808	1.19567	0.106671	1.09767	0.195017		5-Aminoimidazole-4-Carboxamide	0.956045
GC-MS	Trans-4-Hydroxy-L-Proline	1.11567	0.702952	1.01433	0.297347	1.456	0.387181	1.07267	0.170333		2'-Deoxycytidine	0.970331
LC-MS (-)	Undecanoic Acid	0.922	0.246346	0.916667	0.0826747	0.578	0.364876	0.965333	0.0942202		Citrulline	0.984454
GC-MS	Uracil	1.13767	1.1202	1.47967	0.7373	1.55167	0.121384	0.477	0.471		O-Phosphocolamine	0.984573
LC-MS (-)	Uridine 5_-Triphosphate	0.3986	0.2992	0.678	0.0926661	0.962	0.214836	0.612467	0.256586		Undecanoic Acid	0.984608
LC-MS/MS (+)	Uridine 5'-Monophosphate	0.295867	0.169067	1.15767	0.0855109	0.5082	0.3814	1.16767	0.223319		Glycocholic Acid	0.987909
LC-MS (-)	Xanthosine 5'-Monophosphate	1.34233	0.0966805	0.848	0.0355106	0.0144667	0.00826667	1.13267	0.124384		Benzene-1,2,4-Triol	0.988889

## Sheet: Group 1_Volcano results
Metabolites		raw.pval
Thymidine 5'-Monophosphate		0.0078127
Xanthosine 5'-Monophosphate		0.008585
Uridine 5'-Monophosphate		0.010409
Thymidine-5'-Diphosphate		0.011323
Soyasapogenol B 3-O-B-D-Glucuronide		0.013483
L-Ornithine		0.017745
2,3-Dideoxyuridine		0.022076
Ribose		0.037971
Cellobiose		0.038949
2'-Deoxyinosine-5'-Triphosphate		0.039375
Methyl Heptadecanoate		0.042356

## Sheet: Group 1_anova_posthoc (1)
Metabolites	p.value	FDR
Thymidine 5'-Monophosphate	2.669e-06	0.00052045
Xanthosine 5'-Monophosphate	1.3676e-05	0.0013335
2,3-Dideoxyuridine	2.4208e-05	0.0015735
2'-Deoxyinosine-5'-Triphosphate	0.00010253	0.0049982
Citrulline	0.00099001	0.03861

## Sheet: Group 2 Mean SE ttest
		GelMA(-)/PA-GSR(+) (hMSCs, GM)		GelMA(-)/PA-GSR(+) (hMSCs, N2B27)		GelMA(-) (hMSCs, GM)		GelMA(-)/PA-RGDS(+) (hMSCs, GM)			GelMA(-)/PA-GSR(+), GM vs N2B27
Instrument	Metabolites	Mean	SE	Mean	SE	Mean	SE	Mean	SE		Metabolite	p-value
LC-MS (-)	2,5-Dihydroxybenzoic Acid	0.979676	0.305906	0.961854	0.331001	1.08879	0.430195	0.969681	0.440213		10-Hydroxydecanoate	1.59616e-08
LC-MS (+)	(2e,4e)-N-(2-Methylpropyl)Dodeca-2,4-Dienamide	1.63386	0.636017	1.05966	0.0171431	0.687662	0.00871649	1.3054	0.460214		Cholest-5-En-3-Ol	1.95783e-06
LC-MS (+)	(9z)-9-Octadecenoic Acid	0.869398	0.316145	1.64865	0.0615743	0.237109	0	0.892463	0.327677		2-Oxobutyric Acid	3.00141e-06
LC-MS (+)	(9z,12e)-15,16-Dihydroxyoctadeca-9,12-Dienoic Acid	0.853833	0.0475021	0.71626	0.0585484	1.54757	0.712297	0.872672	0.0655605		5-Phospho-D-Ribose 1-Diphosphate	2.62368e-05
LC-MS (-)	(E)-2-Decylpent-2-Enedioic Acid	1.15046	0.473845	1.00378	0.0960105	0.780026	0.0638704	1.06573	0.155471		Gly-Pro	9.87918e-05
LC-MS (-)	(S)-Malate	0.616462	0.183307	1.6162	0.310786	0.837995	0.389101	0.265252	0.102729		Homoserine	0.000107766
LC-MS (-)	1,3,7-Trimethyluric Acid	0.732544	0.0557948	1.65625	0.0916007	1.05715	0.037857	0.865849	0.0976588		N2,N2-Dimethylguanosine	0.000243709
GC-MS	1,3-Diaminopropane	0.773764	0.132648	1.46302	0.13018	1.25027	0.0744325	1.50696	0.2604		Squalene	0.00026384
LC-MS/MS (-)	1,7-Bis(4-Hydroxyphenyl)Heptan-3-One	0.698082	0.283614	0.562955	0.21605	0.479798	0.174472	0.812131	0.0847477		2'-Deoxycytidine	0.000370893
LC-MS (-)	10-Hydroxydecanoate	0.831723	0.00312448	1.40605	0.00269328	1.6981	0.266893	0.54504	0.024435		Taurine	0.000644591
LC-MS (-)	16-Glucuronide-Estriol	1.1955	0.11232	0.962832	0.0977553	1.70346	0.107137	0.911728	0.10267		Acetyl-L-Serine	0.000750726
LC-MS (+)	18:1(2s-Oh)	0.751185	0.152744	1.37796	0.335536	0.899031	0.419047	0.711813	0.235057		1,3,7-Trimethyluric Acid	0.000999177
GC-MS	1-Hexadecanol	0.142059	0.0608714	0.0251006	0.0105672	2.40965	0.434041	0.132451	0.0380212		4-Methyl-5-Thiazoleethanol	0.00110244
LC-MS (-)	1-Myristoyl-2-Hydroxy-Sn-Glycero-3-Phosphoethanolamine	0.711522	0.108091	0.478246	0.0497343	1.31726	0.16909	1.56226	0.375123		Isomaltose	0.00133417
LC-MS/MS (+)	1-O-Alpha-D-Glucopyranosyl-1,2-Eicosandiol	0.709597	0.294262	1.24657	0.156336	0.0399839	0	1.04384	0.297648		Dl-3-Aminoisobutyric Acid	0.00141785
LC-MS/MS (-)	2-(14,15-Epoxyeicosatrienoyl) Glycerol	1.02425	0.241427	1.03875	0.0438136	1.28442	0.0121844	1.10355	0.0999457		Arabitol	0.00245126
LC-MS/MS (+)	24-Nor-5beta-Cholane-3alpha,7alpha,12alpha,22,23-Pentol	0.967939	0.0760041	1.00413	0.0029412	0.24913	0.00112433	0.902528	0.042166		Norepinephrine	0.00254972
LC-MS (+)	27-Hydroxycholesterol	0.784245	0.0833726	0.760667	0.0151414	0.598236	0.235134	0.815573	0.0208499		4-Pyridoxate	0.00309421
GC-MS	2'-Deoxycytidine	2.33383	0.114883	1.01447	0.0292496	0.521057	0.0895379	1.06879	0.256948		Nicotinic Acid	0.00447466
LC-MS (-)	2-Hydroxy-4-Methylpentanoic Acid	0.33753	0.128075	0.436899	0.177759	2.22687	0.499934	0.5679	0.0929506		Cytidine-5'-Monophosphate	0.0050502
GC-MS	2-Hydroxyphenylacetic Acid	1.42026	0.501585	1.52163	0.220767	0.622838	0.108525	1.17558	0.249191		Tetracosanoic Acid	0.00774597
GC-MS	2-Isopropylmalic Acid	2.0147	0.407831	1.34496	0.0295366	0.633216	0.182242	0.986941	0.246403		Citraconic Acid	0.00798032
GC-MS	2-Ketocaproic Acid	0.422642	0.131481	0.560759	0.181956	2.90643	0.251753	0.45664	0.178697		L-Alanine	0.00870302
LC-MS (+)	2-Myristoylglycerol	0.769638	0.0508163	0.795915	0.042152	0.946056	0.0253209	0.662633	0.039276		D-Sorbitol	0.00926794
LC-MS (-)	2-Oxobutyric Acid	0.801347	0.0172282	0.154301	0	1.35206	0.134068	0.846591	0.010461		Fumaric Acid	0.0098684
LC-MS (+)	2-Quinolinecarboxylic Acid	1.25368	0.097673	0.900081	0.116183	1.81567	0.171285	0.777829	0.0044943		Tryptophan	0.0106257
LC-MS (-)	3,4-Dihydroxyphenylalanine	1.07644	0.279341	0.473609	0.177544	0.687186	0.284332	1.85615	0.868815		Succinic Acid	0.0125732
LC-MS (+)	3-Aminoisobutanoate	0.712099	0.0610464	0.713552	0.0277667	0.442839	0.161032	0.693987	0.0128075		Indole-3-Carboxylic Acid	0.0127462
LC-MS (-)	3'-Dephosphocoenzyme A	0.722597	0.370006	0.439901	0.184566	1.9555	0.709291	0.881997	0.074261		Thymine	0.0151809
GC-MS	3-Hydroxypropanoic Acid	1.9326	0.70872	0.984476	0.128216	0.697492	0.0883066	1.3118	0.357272		Ribitol	0.0161657
GC-MS	3-Methyl-2-Oxobutanoic Acid	0.68692	0.248354	0.725032	0.0792868	0.355936	0.101234	0.896365	0.209598		Threonine	0.0201637
LC-MS (-)	3-Methyladipic Acid	0.785077	0.347923	0.789855	0.0649141	1.32896	0.619863	0.595651	0.0863137		1,3-Diaminopropane	0.0206802
LC-MS (-)	3-Methylcrotonylglycine	0.829952	0.247418	0.9922	0.144726	1.74393	0.0655744	0.854352	0.0260823		L-(+) Lactic Acid	0.0214013
GC-MS	3-Phenyllactic Acid	0.509496	0.054249	1.21636	0.448626	2.62895	0.867806	0.48252	0.106684		Proline	0.0251917
LC-MS (-)	3-Phospho-D-Glycerate	0.27342	0.104691	0.423599	0.0597028	0.908741	0.422352	1.65041	0.793187		Oleamide	0.0273387
GC-MS	4-Acetamidobutyric Acid	0.982415	0.490284	1.32694	0.00264423	0.905466	0.0316606	0.813251	0.464196		Methyl Palmitoleate	0.027756
LC-MS (-)	4-Aminobutanoate	0.704686	0.217866	0.802567	0.368551	0.84847	0.391502	0.808181	0.371357		L-Pipecolic Acid	0.0337751
LC-MS (+)	4-Cholesten-3-One	0.711948	0.222484	2.11425	0.949725	0.223785	0.0825203	0.215398	0.0783265		Citrulline	0.0337774
LC-MS (-)	4-Hydroxy-2-Quinolinecarboxylic Acid	1.1816	0.600888	0.807056	0.364809	1.12422	0.476304	0.887126	0.457758		Myo-Inositol	0.0348152
LC-MS (-)	4-Hydroxy-L-Phenylglycine	0.866129	0.39659	0.375837	0.151444	1.22923	0.578139	1.05633	0.399287		Indole-3-Acetaldehyde	0.0353421
GC-MS	4-Methyl-5-Thiazoleethanol	1.7011	0.0518795	0.745907	0.101288	1.22394	0.214158	1.24952	0.105966		Tyrosine	0.0364361
LC-MS (-)	4-Pyridoxate	0.264192	0.09607	1.98462	0.251905	0.441972	0.18496	1.2436	0.0261578		L-Valine	0.0480529
LC-MS/MS (+)	5,7-Dihydroxy-2-(4-Methoxyphenyl)-3,4-Dihydro-2h-1-Benzopyran-4-One	1.31854	0.0106883	1.32791	0.12369	0.702296	0.25538	0.9248	0.366632		5-Hydroxyindoleacetate	0.0496377
LC-MS (-)	5alpha-Cholestan-3beta-Ol-6-One	0.687107	0.0307441	0.619796	0.0123532	1.00303	0.0204649	0.590357	0.0231285		(S)-Malate	0.0502924
LC-MS (+)	5alpha-Cholestanol	2.26783	1.13214	1.08154	0.0541592	0.0129917	0.00472427	0.270586	0.133521		L-Threonine	0.051039
GC-MS	5-Aminovaleric Acid	2.34935	1.26512	0.142902	0.0378396	0.299881	0.0218917	2.16885	1.12383		Ribose	0.0523482
LC-MS (-)	5-Hydroxyindoleacetate	1.36452	0.211868	0.762325	0.0437641	1.76455	0.0864146	0.563303	0.0636048		Glycocholate	0.0524335
LC-MS (-)	5-Hydroxymethylcytidine	0.873449	0.205915	1.04399	0.230118	1.03469	0.483789	0.82332	0.281616		Glucoheptonic Acid	0.0600367
LC-MS (-)	5-Methoxy-3-Indoleacetic Acid	1.27307	0.165172	0.865054	0.020759	1.50607	0.156541	0.725192	0.00258621		L-Tryptophan	0.0619169
LC-MS (-)	5-Methoxytryptamine	1.18347	0.0194232	0.987145	0.107192	1.74737	0.0332555	0.899202	0.0246893		Alanine	0.0656177
LC-MS (+)	5-Methylcytosine	0.99324	0.183716	1.30608	0.0460527	1.16568	0.0648468	0.79643	0.12945		Hypotaurine	0.0677689
LC-MS (-)	5-Phospho-D-Ribose 1-Diphosphate	1.27291	0.0364168	0.34545	0.0220272	1.9003	0.111251	1.32158	0.136519		Tricosanoic Acid	0.0678541
GC-MS	8-Aminocaprylic Acid	1.38799	0.387699	1.93728	0.108144	0.802428	0.126056	0.87134	0.127474		Glycerol	0.0680082
LC-MS (+)	Acetyl Coenzyme A	0.901691	0.14722	1.09364	0.164108	0.708869	0.289765	0.777484	0.0487608		L-Homoserine	0.0688163
GC-MS	Acetyl-L-Serine	1.44423	0.00377642	1.38434	0.00523489	0.725035	0.0899016	1.4359	0.429994		D-Glucose	0.0693185
LC-MS (+)	Aconitic Acid	1.0599	0.0650169	0.917517	0.0481591	1.65386	0.0406662	0.467009	0.169821		5-Methoxy-3-Indoleacetic Acid	0.0703707
GC-MS	Alanine	0.553178	0.209316	1.32917	0.226477	2.34658	0.687793	0.65146	0.225926		(9z)-9-Octadecenoic Acid	0.0728116
GC-MS	Arabitol	1.35577	0.102754	0.557394	0.0570138	1.46004	0.178152	1.01058	0.0876534		Thymidine 5'-Monophosphate	0.0734052
LC-MS/MS (-)	Arachidonic Acid	1.51645	0.263874	1.20228	0.157878	1.06752	0.120942	1.16587	0.197306		Quinaldic Acid	0.0778192
LC-MS (+)	Argininosuccinic Acid	1.02343	0.291437	1.20781	0.397246	0.875209	0.289505	0.893545	0.204005		D-Threitol	0.0794973
GC-MS	Aspartic Acid	1.45702	0.656393	0.798367	0.00137626	1.33908	0.329216	0.797737	0.0442015		2-Quinolinecarboxylic Acid	0.0802886
GC-MS	Beta- Alanine	0.83828	0.0384799	1.18823	0.174014	0.990998	0.130249	1.54519	0.311486		Phenylalanine	0.0811414
LC-MS (+)	C17-Sphinganine	0.942414	0.115339	1.57368	0.574748	0.305819	0.111207	0.676602	0.144914		Sebacic Acid	0.0821315
LC-MS/MS (+)	Cholest-5-En-3-Ol	0.0366677	0.000300108	1.28476	0.0298569	1.57384	0.783305	0.00722958	0		Ribonic Acid-Gamma-Lactone	0.0836619
GC-MS	Cholesterol	0.91145	0.305633	0.596777	0.158216	0.300561	0.0610151	1.08259	0.167497		Myristic Acid	0.0877019
LC-MS (+)	Cholic Acid	0.997339	0.107905	0.99778	0.0575964	0.780771	0.31906	0.845631	0.0764254		Sucrose	0.0894362
LC-MS (+)	Citraconic Acid	1.05669	0.0824837	0.399739	0.105312	1.36639	0.0395073	1.18421	0.0861995		Fa 18:1+3o	0.0900197
GC-MS	Citramalic Acid	1.13711	0.395926	0.47242	0.0853962	2.14992	0.771408	1.05688	0.226664		Uracil	0.0900531
GC-MS	Citric Acid	1.12153	0.357685	0.985008	0.0893841	1.00581	0.0905411	1.02198	0.0930646		Dl-Isoleucine	0.0923643
GC-MS	Citrulline	0.674506	0.253434	1.88382	0.284736	1.87787	0.0950459	0.492519	0.161061		L-Tyrosine	0.10366
LC-MS (-)	Coenzyme A	1.3182	0.619656	0.0788873	0	0.434936	0.0233825	1.09614	0.240288		Lysine	0.104103
LC-MS (+)	Creatinine	1.00546	0.502484	0.151475	0.0622249	0.774238	0.0371559	0.789816	0.205813		Decanoic Acid	0.105999
GC-MS	Cytidine	1.26269	0.294328	1.19888	0.0709611	0.828065	0.107653	0.865644	0.161692		L-Ornithine	0.106765
LC-MS (-)	Cytidine 5'-Diphosphate	1.08094	0.25583	1.29763	0.058319	0.644269	0.0203131	1.29745	0.27792		Leukotriene C4	0.108434
LC-MS (+)	Cytidine-3',5'-Cyclicmonophosphate	1.00826	0.0385624	0.895438	0.143618	1.30756	0.00219936	0.788747	0.0193398		5alpha-Cholestan-3beta-Ol-6-One	0.11202
LC-MS (-)	Cytidine-5'-Monophosphate	0.669431	0.192831	1.94824	0.123686	0.397857	0.183177	0.572754	0.239737		Coenzyme A	0.116117
GC-MS	D-(+) Trehalose	0.660138	0.164628	0.601045	0.0144039	0.662509	0.0130427	0.263371	0.0378398		Pc (12:0/0:0)	0.116117
LC-MS (-)	Decanoic Acid	1.05699	0.062662	1.26413	0.0773936	0.520133	0.00565018	0.877518	0.0100739		Phenylacetylglutamine	0.116117
GC-MS	D-Glucose	0.428002	0.141647	0.873104	0.111988	1.73981	0.313385	0.305127	0.148404		Uridine 5-Triphosphate	0.116117
GC-MS	D-Glucose-6-Phosphoric Acid	0.669363	0.00854646	0.712637	0.197689	0.834853	0.139895	0.494222	0.140664		L-Tryptophanamide	0.116117
GC-MS	Dl-3-Aminoisobutyric Acid	0.668481	0.130901	1.86548	0.0779437	1.38208	0.343078	1.06366	0.213477		Inosine	0.118571
GC-MS	Dl-Isoleucine	0.563447	0.324958	1.3248	0.117735	1.66152	0.32592	0.822689	0.293794		Purine Riboside	0.120915
GC-MS	D-Malic Acid	2.71695	1.3615	0.621747	0.016032	0.145217	0.0266049	0.428644	0.126163		Beta- Alanine	0.121055
LC-MS/MS (-)	Docosahexanoic Acid	1.24111	0.136805	1.03973	0.0887942	1.67129	0.139251	0.96535	0.189863		1-Myristoyl-2-Hydroxy-Sn-Glycero-3-Phosphoethanolamine	0.121477
GC-MS	D-Sorbitol	1.34153	0.163728	0.522062	0.0593013	1.36688	0.144884	1.04966	0.0394877		Glycolithocholic Acid	0.122206
GC-MS	D-Threitol	1.1425	0.227966	0.583653	0.0716629	0.877202	0.19441	0.872166	0.190149		N-(4-Aminobutyl)-3-(4-Hydroxy-3-Methoxyphenyl)Propanimidic Acid	0.127155
LC-MS (-)	Eicosenoic Acid	0.670615	0.0925586	0.809393	0.215041	0.0111361	0.0040495	0.663636	0.0411201		Methylmalonic Acid	0.130672
LC-MS (+)	Erucamide	0.913895	0.0577428	0.717362	0.278937	0.793558	0.317035	0.850777	0.030793		1-Hexadecanol	0.131281
LC-MS/MS (-)	Fa 18:1+3o	1.37868	0.0178247	1.11557	0.116856	1.21109	0.124948	1.22177	0.153507		Xanthosine 5'-Monophosphate	0.136417
GC-MS	Fructose	0.475188	0.233762	0.144172	0.042205	0.125579	0.0557595	0.407665	0.161736		L-Serine	0.141236
GC-MS	Fumaric Acid	0.823479	0.231994	1.90153	0.024264	0.819	0.127494	1.14418	0.174635		(9z,12e)-15,16-Dihydroxyoctadeca-9,12-Dienoic Acid	0.142099
LC-MS/MS (+)	Glccer (D18:1/16:0)	0.92602	0.110639	0.902463	0.0406936	0.71566	0.293573	0.804698	0.0936073		3,4-Dihydroxyphenylalanine	0.142662
LC-MS/MS (+)	Glccer(D18:1/12:0)	0.699686	0.0975451	1.55708	0.544717	0.574112	0.233983	0.629301	0.0292893		Quinolinic Acid	0.143706
GC-MS	Glucoheptonic Acid	1.4215	0.0595105	1.90427	0.17587	0.649262	0.0791119	0.945695	0.0379104		5-Methoxytryptamine	0.145873
GC-MS	Glutamic Acid	0.483462	0.275328	0.99215	0.138286	3.02373	0.890081	0.462331	0.185366		L-Glutamic Acid	0.150961
LC-MS (+)	Glutamine (L)	0.996537	0.467578	0.481023	0.100525	1.56824	0.320919	0.718677	0.0427634		Lpc 16:0	0.15275
GC-MS	Glyceric Acid	1.0713	0.275518	0.613623	0.091705	1.344	0.22409	1.52278	0.486048		Aconitic Acid	0.15327
GC-MS	Glycerol	0.320931	0.118364	0.630611	0.0393424	0.570981	0.243389	1.16162	0.427587		L-Histidine	0.156209
GC-MS	Glycerol 1-Phosphate	1.58672	0.428241	0.872627	0.0195802	0.96975	0.213615	1.00081	0.102929		5-Aminovaleric Acid	0.156237
GC-MS	Glycine	0.897121	0.515777	1.79902	0.30601	1.43982	0.226493	0.86245	0.296407		L-Pyroglutamic Acid	0.158154
LC-MS (-)	Glycochenodeoxycholic Acid	0.817395	0.192919	0.392017	0.155468	2.34987	0.0334612	0.573336	0.10594		Glycochenodeoxycholic Acid	0.161143
LC-MS (-)	Glycocholate	1.16883	0.281416	0.33489	0.118771	2.13391	0.0504004	0.951347	0.120943		Tyramine	0.162512
LC-MS/MS (-)	Glycocholic Acid	1.19204	0.171392	0.962746	0.281542	1.36183	0.407278	1.3351	0.222512		18:1(2s-Oh)	0.164332
LC-MS (-)	Glycolithocholic Acid	0.0275877	0.00326776	1.04436	0.519987	1.16222	0.578918	1.09435	0.544984		Creatinine	0.16695
GC-MS	Gly-Pro	0.130001	0.0150527	3.03779	0.185883	1.56107	0.854896	0.254074	0.0831808		Pg(16:1(9z)/0:0)	0.169265
LC-MS (-)	Guanosine Cyclic Monophosphate	1.00215	0.435687	1.07817	0.143729	1.8469	0.00892228	0.760522	0.0615815		Glycerol 1-Phosphate	0.17109
LC-MS (-)	Hippurate	0.179814	0.0653869	0.210042	0.0805009	1.73213	0.152516	0.0490401	0		5-Methylcytosine	0.173936
LC-MS (-)	Histamine	0.531393	0.247348	0.685	0.246919	2.06434	0.926018	0.361294	0.102657		Glutamic Acid	0.174079
LC-MS (-)	Homoserine	0.214219	0.0425558	1.35783	0.0617341	1.68476	0.372728	0.325255	0.0548829		Citramalic Acid	0.176124
LC-MS (-)	Hydroxymethylglutaric Acid	0.910094	0.247321	1.08546	0.0135525	1.22746	0.142478	0.776992	0.137073		2-Isopropylmalic Acid	0.176783
GC-MS	Hypotaurine	0.951465	0.280872	0.238666	0.0576001	1.40021	0.330926	0.847036	0.0420465		1-O-Alpha-D-Glucopyranosyl-1,2-Eicosandiol	0.182364
LC-MS (-)	Indole-3-Acetaldehyde	0.256165	0.0432892	0.587743	0.0968581	3.15997	0.989223	0.354118	0.153382		L-5-Oxoproline	0.18444
LC-MS (+)	Indole-3-Carboxylic Acid	0.309651	0.127748	0.858887	0.0084432	2.50103	0.0370936	0.328017	0.135645		Pentadecanoic Acid	0.185134
GC-MS	Inosine	0.670345	0.25293	0.168841	0.00836148	0.530259	0.205737	0.42938	0.152078		Glyceric Acid	0.190123
GC-MS	Isoleucine	0.433318	0.221114	0.618908	0.265166	2.79302	0.0473024	0.57233	0.23048		Serine	0.191732
GC-MS	Isomaltose	1.00469	0.190296	2.52919	0.0157993	0.67477	0.0932807	0.50441	0.0948437		3-Phenyllactic Acid	0.19281
LC-MS (-)	Isopropylmalic Acid	0.676454	0.283383	0.65015	0.0844616	1.10282	0.063891	0.807948	0.0692309		16-Glucuronide-Estriol	0.193188
LC-MS (-)	Ketoisovaleric Acid	0.937979	0.00120022	0.825443	0.0757223	1.50355	0.00896945	0.733023	0.0254448		Glccer(D18:1/12:0)	0.196219
GC-MS	L-(+) Lactic Acid	1.99222	0.3806	0.588049	0.0396938	0.496182	0.168368	1.76477	0.533299		D-Malic Acid	0.198685
LC-MS (+)	L-2,3-Diaminopropionic Acid	0.701201	0.0642459	0.700147	0.00182474	0.558676	0.220346	0.709664	0.0477809		Xanthine	0.20032
LC-MS/MS (-)	L-5-Oxoproline	0.527955	0.279181	0.0762649	0.0395898	0.539784	0.024798	0.442349	0.0866079		Glycine	0.207052
GC-MS	L-Alanine	0.74055	0.163842	1.74009	0.129133	1.58898	0.356096	0.767791	0.270527		Ketoisovaleric Acid	0.211472
LC-MS (-)	Leukotriene C4	0.493296	0.17938	0.867014	0.0270192	1.16553	0.515497	0.653025	0.259245		Trans-4-Hydroxy-L-Proline 2	0.219746
GC-MS	L-Glutamic Acid	3.61621	1.89524	0.256481	0.00538004	0.489916	0.0137429	0.428236	0.100986		Phosphatidylethanolamine (14:0/15:0)	0.223829
LC-MS (-)	L-Histidine	1.99786	0.97245	0.302042	0.0214898	0.698614	0.0648208	1.43851	0.574102		4-Cholesten-3-One	0.223917
GC-MS	L-Homoserine	0.333462	0.156223	0.780386	0.0910337	3.54941	0.412614	0.188604	0.0726094		N-Acetyl-Ornithine	0.224346
LC-MS (+)	Lithocholic Acid	0.792388	0.394799	0.446705	0.212495	0.915067	0.446676	1.35212	0.665201		Oxalic Acid	0.235866
GC-MS	L-Methionine	0.899277	0.0560864	0.864972	0.0934126	1.34771	0.220908	0.821048	0.00794853		Fructose	0.235904
GC-MS	L-Norleucine	0.547263	0.313422	0.54954	0.300895	2.2049	0.444601	0.701955	0.280899		Putrescine	0.243534
GC-MS	L-Ornithine	0.29095	0.127464	1.30963	0.474377	2.35091	1.09605	1.04355	0.548646		8-Aminocaprylic Acid	0.244071
LC-MS (-)	Lpc 16:0	1.62112	0.812813	0.182375	0.0748672	0.261613	0.0568179	1.32908	0.64822		3-Hydroxypropanoic Acid	0.258393
LC-MS (+)	L-Pipecolic Acid	0.411123	0.176905	1.04461	0.0926048	1.16138	0.505072	0.0573132	4.90654e-18		Trans-Aconitic Acid	0.278401
GC-MS	L-Proline	0.698805	0.333649	1.25869	0.613592	1.62822	0.0569095	0.71773	0.323426		3-Phospho-D-Glycerate	0.280722
GC-MS	L-Pyroglutamic Acid	0.331404	0.125059	0.68237	0.159315	0.822707	0.370711	0.904968	0.411841		Docosahexanoic Acid	0.284514
GC-MS	L-Serine	0.653998	0.230075	1.07867	0.0303338	2.42883	0.316427	0.49924	0.181883		Phosphoric Acid	0.289739
GC-MS	L-Threonine	0.516661	0.207957	1.25404	0.168281	2.68839	0.0748499	0.394728	0.162108		N8-Acetylspermidine	0.291312
GC-MS	L-Tryptophan	0.874842	0.439411	2.00456	0.00223559	1.28851	0.56612	0.800349	0.368849		N-Acetyl-L-Aspartic Acid	0.295704
LC-MS (-)	L-Tryptophanamide	0.0196187	0	0.222778	0.10158	2.22635	1.10337	0.17296	0.0432244		4-Hydroxy-L-Phenylglycine	0.312417
GC-MS	L-Tyrosine	0.686469	0.189117	1.54942	0.364841	1.90262	0.400413	0.747394	0.215523		Urea	0.318456
GC-MS	L-Valine	0.407247	0.156014	0.866099	0.0471409	2.58498	0.341339	0.4847	0.188926		Noravicholic Acid	0.338815
GC-MS	Lysine	1.8391	0.383348	0.978284	0.147267	0.898776	0.0896064	1.14037	0.0281018		Glutamine (L)	0.341748
GC-MS	Malonic Acid	1.10489	0.604694	1.54863	0.0215118	1.14551	0.507086	0.746824	0.376668		C17-Sphinganine	0.342155
LC-MS (+)	Methyl Palmitoleate	1.68699	0.159751	0.611052	0.275212	0.48974	0.107733	0.880138	0.191945		Trans-3-Hexenedioic Acid	0.345129
GC-MS	Methylmalonic Acid	1.38141	0.438834	0.543137	0.0516568	1.19325	0.21095	1.72069	0.203892		5alpha-Cholestanol	0.354346
GC-MS	Myo-Inositol	1.58164	0.222319	0.868058	0.046778	1.30379	0.26376	1.0197	0.0843169		Taurocholic Acid	0.362394
GC-MS	Myristic Acid	1.12914	0.0581555	0.908541	0.0789666	0.569538	0.0755315	1.26583	0.0185233		Arachidonic Acid	0.364689
LC-MS/MS (-)	N-(4-Aminobutyl)-3-(4-Hydroxy-3-Methoxyphenyl)Propanimidic Acid	0.661145	0.250276	1.1434	0.019967	0.588844	0.214125	0.999405	0.0730243		Aspartic Acid	0.372425
LC-MS (+)	N2,N2-Dimethylguanosine	1.23478	0.085036	0.180955	0	1.68058	0.0349556	0.663502	0.241273		Cholesterol	0.412272
LC-MS (+)	N8-Acetylspermidine	0.949142	0.0915922	0.629819	0.246431	0.747646	0.262477	0.8887	0.110096		(2e,4e)-N-(2-Methylpropyl)Dodeca-2,4-Dienamide	0.417834
GC-MS	N-Acetyl-L-Aspartic Acid	1.49042	0.557887	0.787741	0.174879	0.619266	0.0458823	2.00972	0.716647		N-Acetyl-L-Glutamic Acid	0.431014
GC-MS	N-Acetyl-L-Glutamic Acid	0.41775	0.15548	0.598037	0.135235	0.49781	0.0911889	0.80304	0.423516		Acetyl Coenzyme A	0.433077
LC-MS (-)	N-Acetylneuraminate	0.293374	0.0825818	0.28704	0.0137503	0.775253	0.130882	0.102441	0.0099513		Cytidine 5'-Diphosphate	0.455309
GC-MS	N-Acetyl-Ornithine	1.81266	0.817021	0.638829	0.0259745	0.595311	0.0412263	1.94019	0.717838		L-Proline	0.467686
GC-MS	Nicotinic Acid	1.62581	0.122788	0.768874	0.0834855	1.15457	0.227406	1.20088	0.134601		Lithocholic Acid	0.48372
LC-MS/MS (-)	Noravicholic Acid	0.885223	0.0647367	0.961197	0.0266356	0.138471	0	0.828214	0.0784382		Cytidine-3',5'-Cyclicmonophosphate	0.490284
GC-MS	Norepinephrine	0.405289	0.149608	2.49718	0.272845	1.50578	0.455953	0.574329	0.197456		Pa(12:0/12:0)	0.491876
LC-MS/MS (+)	Oleamide	0.776962	0.020272	1.07482	0.0852921	0.905978	0.123704	0.742411	0.0663493		Malonic Acid	0.504005
GC-MS	Oxalic Acid	0.812504	0.432205	4.00402	2.24889	0.0760676	0.00372683	0.0961359	0.0227348		Taurodeoxycholic Acid	0.508007
LC-MS (-)	Pa(12:0/12:0)	1.13078	0.281971	0.894709	0.134423	0.734152	0.141255	1.24036	0.226878		Hydroxymethylglutaric Acid	0.518025
GC-MS	Palmitoleic Acid	1.38148	0.0412091	1.43992	0.126478	0.748964	0.080484	1.10532	0.06688		4-Acetamidobutyric Acid	0.520989
LC-MS (-)	Pc (12:0/0:0)	0.0260252	0	0.159539	0.0667567	0.199764	0.0101597	2.18709	1.18759		Glycocholic Acid	0.524952
LC-MS/MS (-)	Pentadecanoic Acid	1.77923	0.656483	0.721054	0.084512	0.7411	0.0133306	1.44482	0.351599		Erucamide	0.528169
LC-MS/MS (-)	Pg(16:1(9z)/0:0)	0.322432	0.0150686	1.34924	0.612869	1.9191	0.907883	0.40923	0.0681536		3'-Dephosphocoenzyme A	0.53172
LC-MS (+)	Phenylacetylglutamine	0.76058	0.283372	0.193837	0	1.073	0.0387823	0.710735	0.258449		2-Ketocaproic Acid	0.571668
GC-MS	Phenylalanine	0.698355	0.216721	1.48748	0.262168	1.46273	0.182555	0.856014	0.320095		Eicosenoic Acid	0.585221
LC-MS (+)	Phosphatidylethanolamine (14:0/15:0)	1.92736	0.957211	0.511693	0.230219	1.23188	0.609469	0.485006	0.242656		Pyridoxine	0.595358
LC-MS (+)	Phosphocreatine	1.43824	0.668335	0.99066	0.488641	1.07343	0.535829	0.936274	0.465332		3-Methylcrotonylglycine	0.601612
GC-MS	Phosphoric Acid	1.1895	0.192241	0.953974	0.0190373	0.753107	0.0853113	1.1036	0.0404842		5-Hydroxymethylcytidine	0.610163
GC-MS	Picolonic Acid	0.894661	0.108477	0.870776	0.067333	0.739624	0.0135018	1.13497	0.19225		Phosphocreatine	0.617472
GC-MS	Proline	0.388812	0.17767	1.37979	0.221809	2.62081	0.704118	0.500198	0.229612		Isoleucine	0.619407
GC-MS	Purine Riboside	1.73359	0.29945	1.13712	0.0500801	0.688811	0.125067	1.37955	0.277137		4-Hydroxy-2-Quinolinecarboxylic Acid	0.622391
GC-MS	Putrescine	1.62714	0.0813414	1.46543	0.0859483	0.781686	0.0696493	1.11818	0.179867		24-Nor-5beta-Cholane-3alpha,7alpha,12alpha,22,23-Pentol	0.65901
LC-MS (-)	Pyridoxine	0.98975	0.252907	1.13594	0.020238	1.1343	0.0812714	0.796035	0.139236		Sarcosine	0.663825
LC-MS/MS (+)	Quinaldic Acid	1.26576	0.081678	0.997837	0.078974	1.7442	0.0376726	0.847112	0.0498384		2-Hydroxy-4-Methylpentanoic Acid	0.673672
LC-MS (-)	Quinolinic Acid	1.28496	0.364085	0.622839	0.0228514	0.621579	0.0665785	2.24609	0.392941		Histamine	0.682996
GC-MS	Ribitol	1.50055	0.152987	0.628009	0.155694	1.28767	0.232577	1.07433	0.134549		Palmitoleic Acid	0.683114
GC-MS	Ribonic Acid-Gamma-Lactone	1.662	0.662782	0.134195	0.0707396	1.86905	0.544742	1.0629	0.174015		2-Myristoylglycerol	0.710961
GC-MS	Ribose	1.62977	0.114442	1.09744	0.157721	1.27887	0.193009	0.88513	0.0405938		1,7-Bis(4-Hydroxyphenyl)Heptan-3-One	0.723944
GC-MS	Sarcosine	2.38499	1.18436	1.67552	0.94371	0.173171	0.0824887	0.173871	0.0576712		Argininosuccinic Acid	0.727224
LC-MS (-)	Sebacic Acid	0.838358	0.0328557	1.34138	0.215371	1.11076	0.520991	1.42711	0.078795		Citric Acid	0.729943
GC-MS	Serine	0.713096	0.208921	1.04094	0.0035488	1.60853	0.188515	0.8293	0.135713		D-(+) Trehalose	0.738726
GC-MS	Squalene	0.178327	0.0289886	1.19614	0.0786404	0.23805	0.0111192	1.88369	0.503723		L-Methionine	0.768619
GC-MS	Succinic Acid	1.11641	0.102708	1.58527	0.0360578	0.995483	0.0776056	0.994101	0.105118		(E)-2-Decylpent-2-Enedioic Acid	0.776721
GC-MS	Sucrose	0.773301	0.126449	1.05808	0.0171308	0.511255	0.0389358	0.955402	0.227689		Hippurate	0.785184
LC-MS (-)	Taurine	0.543092	0.0278652	0.274092	0.00056205	1.01776	0.0284569	0.437153	0.0122747		27-Hydroxycholesterol	0.794609
LC-MS (-)	Taurocholic Acid	0.895009	0.362523	0.51949	0.0472181	1.75381	0.457489	0.831688	0.238078		Uridine	0.829153
LC-MS (+)	Taurodeoxycholic Acid	0.966342	0.1755	0.838764	0.00864825	0.759336	0.062681	0.982756	0.115835		4-Aminobutanoate	0.830372
LC-MS/MS (+)	Tetracosanoic Acid	1.05946	0.0592179	1.42708	0.0447482	0.347997	0.133276	0.779065	0.214681		D-Glucose-6-Phosphoric Acid	0.837593
GC-MS	Threonine	0.617923	0.155872	1.29531	0.0924722	2.00715	0.0991638	0.737467	0.218572		Cytidine	0.843366
LC-MS (-)	Thymidine 5'-Monophosphate	0.807387	0.0475746	0.625452	0.0585388	0.658486	0.032801	0.848094	0.0372622		Glccer (D18:1/16:0)	0.851365
GC-MS	Thymine	2.12767	0.32493	0.766042	0.0784885	0.662582	0.143918	1.43307	0.159938		Picolonic Acid	0.860707
GC-MS	Trans-3-Hexenedioic Acid	1.15896	0.454595	0.653729	0.128625	1.26326	0.0801701	1.49249	0.217361		2-Hydroxyphenylacetic Acid	0.86225
GC-MS	Trans-4-Hydroxy-L-Proline 2	1.38178	0.380295	0.826664	0.0350913	1.2241	0.170009	1.56668	0.446423		Guanosine Cyclic Monophosphate	0.876418
GC-MS	Trans-Aconitic Acid	1.65052	0.37561	1.17794	0.0336408	0.769379	0.0655531	1.39778	0.317968		3-Methyl-2-Oxobutanoic Acid	0.890843
LC-MS/MS (+)	Tricosanoic Acid	1.0417	0.513114	2.31674	0.000871346	0.324891	0.147149	0.86612	0.229307		Isopropylmalic Acid	0.933395
LC-MS (-)	Tryptophan	0.579765	0.0029349	1.61779	0.22943	1.44085	0.0218189	0.591541	0.118429		N-Acetylneuraminate	0.943331
GC-MS	Tyramine	1.18393	0.399474	2.02984	0.291955	0.378936	0.0249175	1.25064	0.327645		5,7-Dihydroxy-2-(4-Methoxyphenyl)-3,4-Dihydro-2h-1-Benzopyran-4-One	0.943509
GC-MS	Tyrosine	0.754284	0.0282963	0.961196	0.0605961	1.79269	0.540572	1.21712	0.418308		2-(14,15-Epoxyeicosatrienoyl) Glycerol	0.95573
GC-MS	Uracil	2.49876	0.599559	1.1633	0.0243863	0.491642	0.062682	0.829165	0.183386		Xylitol	0.967446
GC-MS	Urea	0.465496	0.229466	0.728529	0.0268105	3.14822	0.480735	0.218746	0.107346		2,5-Dihydroxybenzoic Acid	0.970354
LC-MS (+)	Uridine	1.00531	0.381275	0.890126	0.323682	1.30724	0.532238	1.04454	0.40089		3-Aminoisobutanoate	0.983745
LC-MS (-)	Uridine 5-Triphosphate	0.499344	0.197459	0.104426	9.81308e-18	1.6403	0.767937	1.30371	0.451246		L-2,3-Diaminopropionic Acid	0.987703
GC-MS	Xanthine	0.0209869	0.00240199	0.0666348	0.0297022	1.04647	0.588614	3.82481	2.19653		3-Methyladipic Acid	0.989874
LC-MS (-)	Xanthosine 5'-Monophosphate	1.06983	0.107615	0.864989	0.0234267	0.944743	0.0725113	1.13132	0.0369866		L-Norleucine	0.99607
GC-MS	Xylitol	1.53743	0.561715	1.50808	0.375776	0.67847	0.102936	1.11113	0.0892881		Cholic Acid	0.997297

## Sheet: Group 2_volcano results
Metabolites		raw.pval
10-Hydroxydecanoate		1.5962e-08
Cholest-5-En-3-Ol		1.9578e-06
5-Phospho-D-Ribose 1-Diphosphate		2.6237e-05
Gly-Pro		9.8792e-05
Homoserine		0.00010777
Squalene		0.00026384
2'-Deoxycytidine		0.00037089
Taurine		0.00064459
1,3,7-Trimethyluric Acid		0.00099918
4-Methyl-5-Thiazoleethanol		0.0011024
Isomaltose		0.0013342
Dl-3-Aminoisobutyric Acid		0.0014179
Arabitol		0.0024513
Norepinephrine		0.0025497
4-Pyridoxate		0.0030942
Nicotinic Acid		0.0044747
Cytidine-5'-Monophosphate		0.0050502
Citraconic Acid		0.0079803
L-Alanine		0.008703
D-Sorbitol		0.0092679
Fumaric Acid		0.0098684
Tryptophan		0.010626
Indole-3-Carboxylic Acid		0.012746
Thymine		0.015181
Ribitol		0.016166
Threonine		0.020164
1,3-Diaminopropane		0.02068
L-(+) Lactic Acid		0.021401
Methyl Palmitoleate		0.022053
Proline		0.025192
L-Pipecolic Acid		0.02809
Citrulline		0.033777
Myo-Inositol		0.034815
Indole-3-Acetaldehyde		0.035342
L-Valine		0.048053
5-Hydroxyindoleacetate		0.049638

## Sheet: Group 2_anova_posthoc
Metabolite	p.value	FDR
Taurine	3.8721e-08	7.9378e-06
Indole-3-Carboxylic Acid	5.8147e-07	5.9601e-05
Hippurate	3.4601e-06	0.0001737
Ketoisovaleric Acid	3.5343e-06	0.0001737
5alpha-Cholestan-3beta-Ol-6-One	4.3614e-06	0.0001737
24-Nor-5beta-Cholane-3alpha,7alpha,12alpha,22,23-Pentol	5.084e-06	0.0001737
Isomaltose	6.5465e-06	0.00019172
2-Oxobutyric Acid	1.32e-05	0.00030259
Noravicholic Acid	1.3285e-05	0.00030259
5-Phospho-D-Ribose 1-Diphosphate	1.5395e-05	0.00031559
L-Homoserine	1.8733e-05	0.00034911
Glycochenodeoxycholic Acid	2.6867e-05	0.00041777
L-Threonine	2.8038e-05	0.00041777
5-Methoxytryptamine	2.853e-05	0.00041777
2-Ketocaproic Acid	3.494e-05	0.00047751
Decanoic Acid	3.7976e-05	0.00048657
Quinaldic Acid	4.944e-05	0.00059618
1,3,7-Trimethyluric Acid	0.00011076	0.0012605
Isoleucine	0.00011683	0.0012605
Glucoheptonic Acid	0.00012325	0.0012633
1-Hexadecanol	0.00014282	0.0013942
2'-Deoxycytidine	0.00015183	0.0014147
Citraconic Acid	0.00016854	0.0015022
Aconitic Acid	0.00017966	0.001503
N2,N2-Dimethylguanosine	0.00018329	0.001503
Urea	0.00020994	0.0016553
Myristic Acid	0.00025158	0.0018672
4-Pyridoxate	0.00026194	0.0018672
L-Valine	0.00026414	0.0018672
5-Hydroxyindoleacetate	0.00038649	0.002641
Glycocholate	0.00043458	0.0028738
Tryptophan	0.00064662	0.0041424
Threonine	0.00066984	0.0041611
2-Quinolinecarboxylic Acid	0.00086473	0.0051347
L-Serine	0.00087666	0.0051347
10-Hydroxydecanoate	0.0010973	0.0062485
Homoserine	0.0012834	0.0071107
Cytidine-5'-Monophosphate	0.0014917	0.0080474
Palmitoleic Acid	0.001535	0.0080687
N-Acetylneuraminate	0.0016299	0.0083532
Citrulline	0.0021406	0.010703
Arabitol	0.0022032	0.010754
Tetracosanoic Acid	0.0025077	0.011955
16-Glucuronide-Estriol	0.0025895	0.012065
Thymine	0.002718	0.012132
D-Sorbitol	0.0027223	0.012132
Putrescine	0.0032073	0.013799
D-Glucose	0.0032309	0.013799
Succinic Acid	0.0033605	0.014059
Norepinephrine	0.003444	0.014121
2-Hydroxy-4-Methylpentanoic Acid	0.0038529	0.015487
Squalene	0.0040459	0.01571
Fumaric Acid	0.0040615	0.01571
5-Methoxy-3-Indoleacetic Acid	0.0044558	0.016916
Gly-Pro	0.0050583	0.018854
Eicosenoic Acid	0.005924	0.021686
Cytidine-3',5'-Cyclicmonophosphate	0.0062665	0.022537
4-Methyl-5-Thiazoleethanol	0.0067318	0.023794
3-Methylcrotonylglycine	0.0070492	0.024493
Tricosanoic Acid	0.0073765	0.025203
2-Myristoylglycerol	0.0075841	0.025487
Quinolinic Acid	0.0083493	0.027607
Uracil	0.0093305	0.03016
Methyl Palmitoleate	0.0094159	0.03016
Indole-3-Acetaldehyde	0.0099771	0.031466
Proline	0.01378	0.042801
Serine	0.015578	0.047664
Glutamic Acid	0.016127	0.048619
(9z)-9-Octadecenoic Acid	0.01667	0.049525
